# Supplementary material for: Drosophila Spastin Regulates Synaptic Microtubule Networks and Is Required for Normal Motor Function
Source: PubMed Central journal article supplement (PMC532392; doi:10.1371/journal.pbio.0020429), 2004-11-30

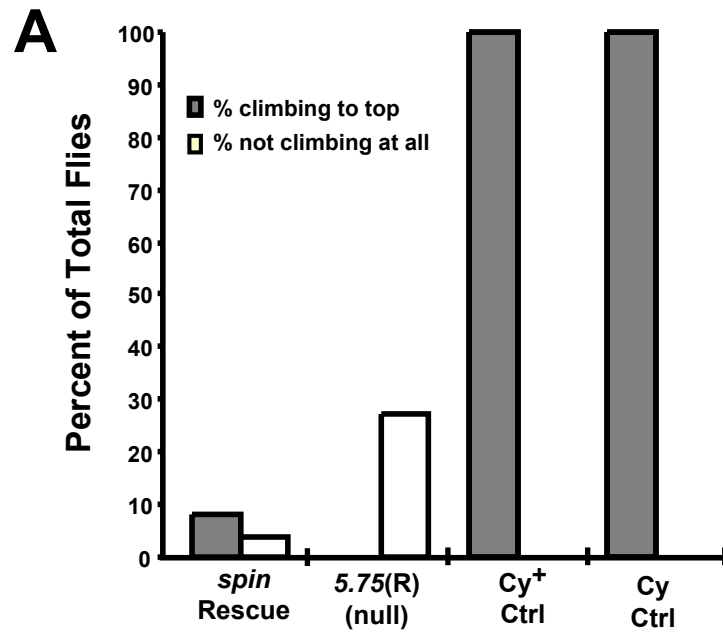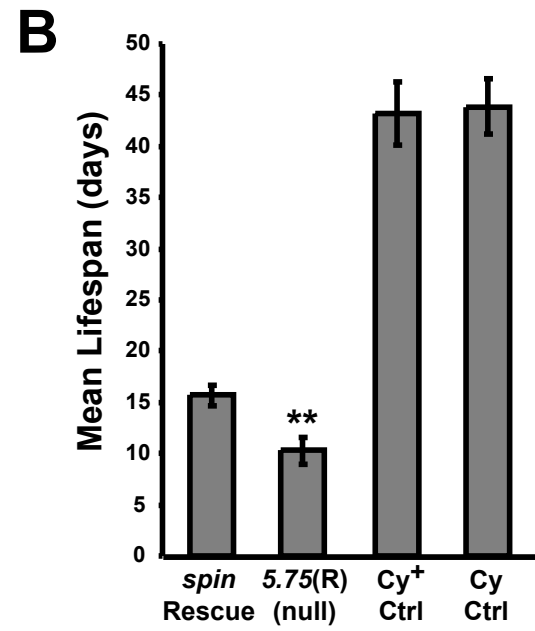

Supplement: pbio.0020429.sg002.pdf [file pbio.0020429.sg002.pdf]
